# Supplementary material
Source: PubMed Central journal article supplement (PMC4213150)

**Supplemental Figure 1.** PSII complex topography in *amiLhcb1* derived from single particle analysis of membrane crystals.

(A) The largest  $C_2S_2+$ , i.e.  $C_2S_2$  with an extra mass in one of the positions of the M trimers.

(B) The most abundant ( $C_2S_2$ ) of the complexes.

(C) The spinach  $C_2S_2M_2$  complex with an extra mass overlaid with the contours of the  $C_2S_2$  complex (yellow) and  $C_2S_2+$  (orange).

Scale bar=10 nm.

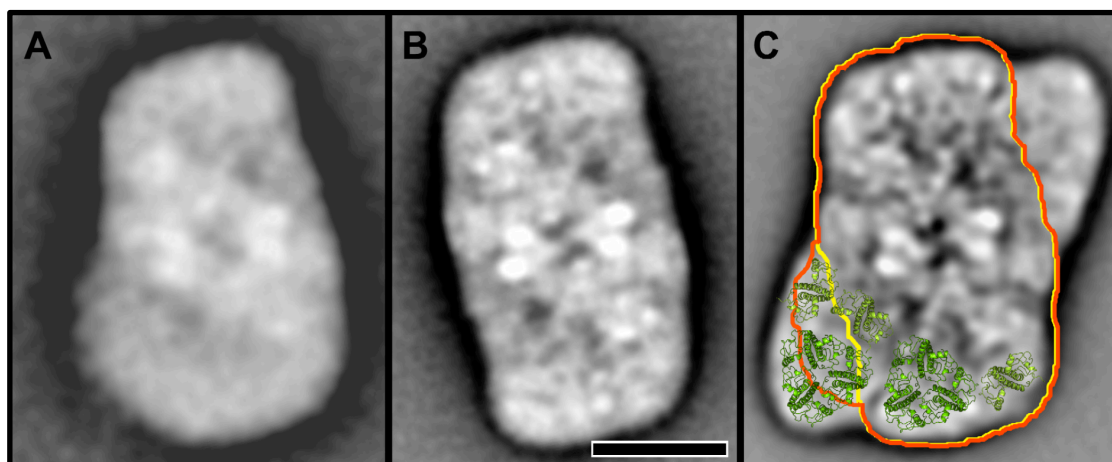

**Supplemental Figure 2.** Micrographs of leaf cross-section demonstrating (A-C) Thylakoid membranes of wt (A), *amiLhcb1* (B), and *amiLhcb2* (C) subjected to PSI light. (D-F) Thylakoid structure of wt (D), *amiLhcb1* (E), and *amiLhcb2* (F) in state 2.

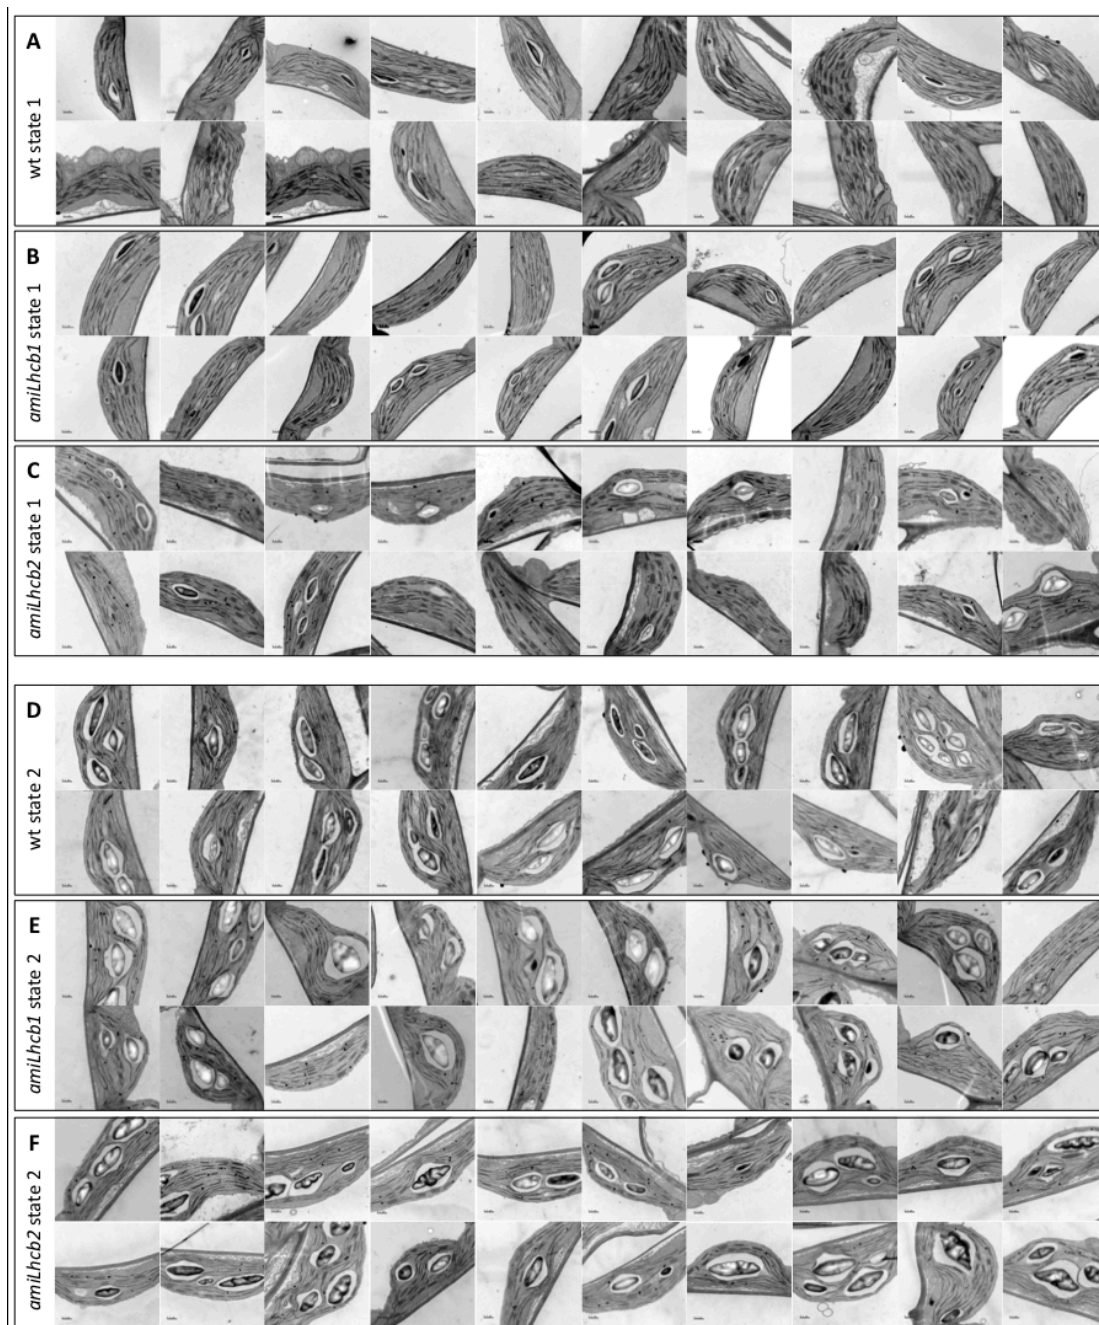

**Supplemental Figure 3.** BN gel electrophoresis of thylakoid complexes and their Lhcb1-3 protein content.

**(A-B)** Thylakoid membranes complexes composition of digitonin-solubilized wild type, *amiLhcb1* (A) and *amiLhcb2* (B) thylakoids (top) and immunoblots with Lhcb1, Lhcb2 and Lhcb3 antibodies (bottom). The identities of the pigment-protein complexes separated are shown to the left. Three replicate gels are shown in each case.

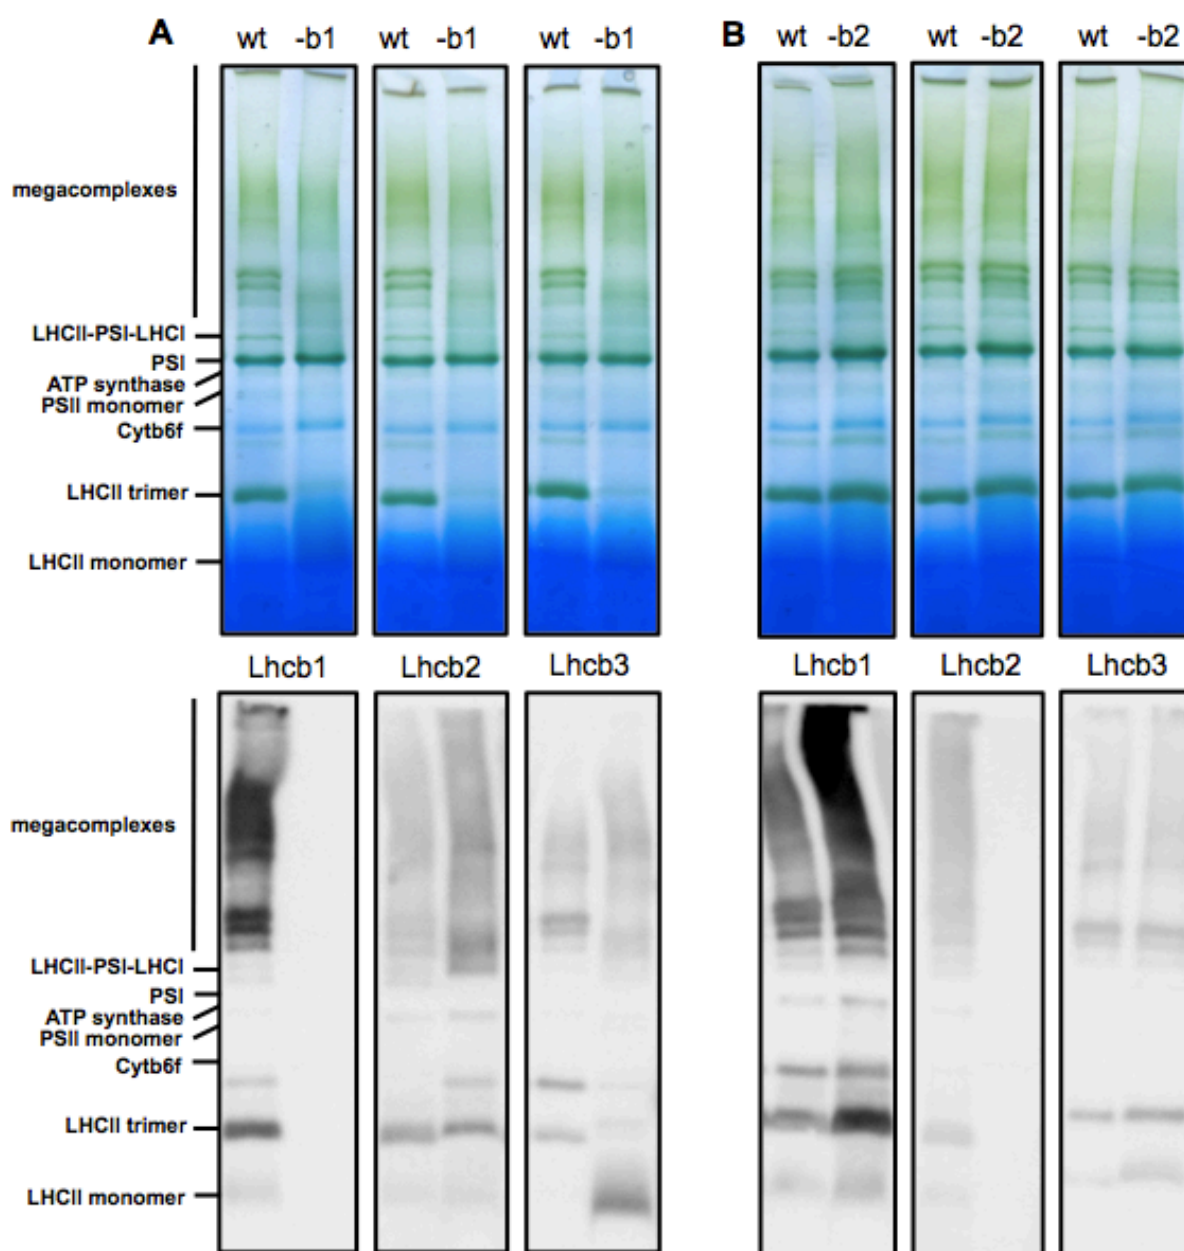

**Supplemental Figure 4.** Visualization of phosphorylated thylakoid proteins with ProQ Diamond staining.

Thylakoid samples were isolated from wt, *amiLhcb1*, and *amiLhcb2* grown under normal light conditions and separated by SDS-PAGE prior to staining.

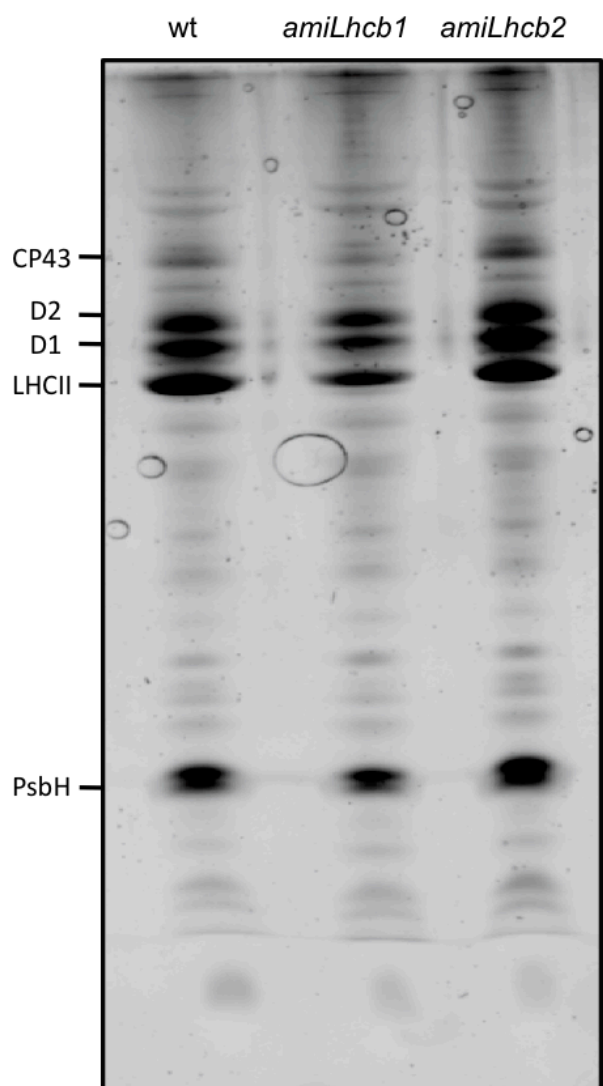

**Supplemental Figure 5.** Pulse-amplitude modulated fluorescence traces.

Fluorescence was recorded after shifts from state 1 to state 2 light and back for wild type (black) and individual Lhcb1 and Lhcb2 T-DNA KO lines.

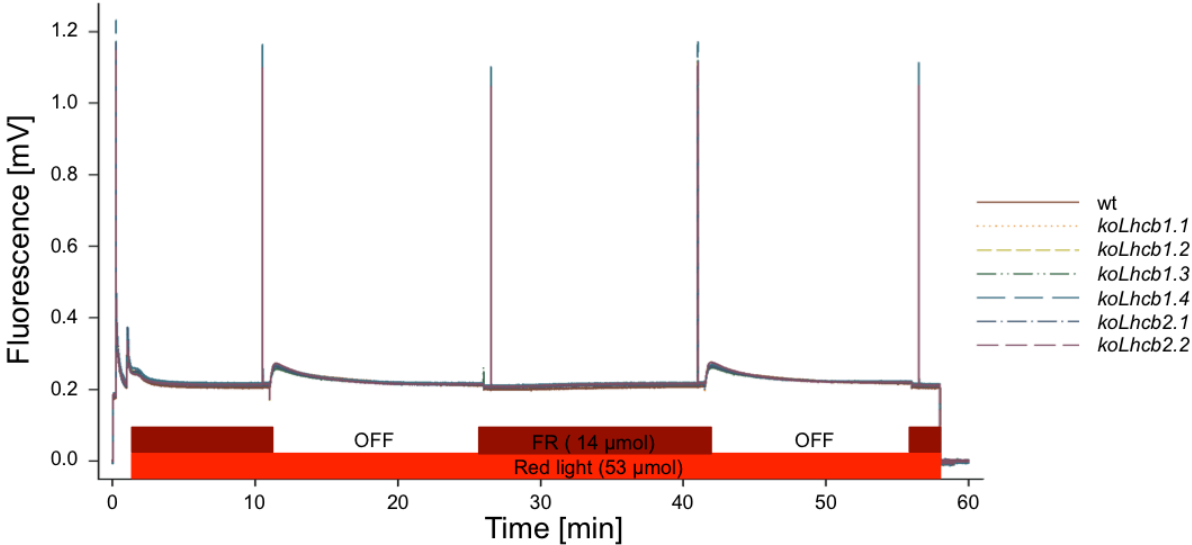

**Supplemental Figure 6.** Non-photochemical quenching in examined lines.

Feedback de-excitation (qE type of NPQ) induction and relaxation in wild type (black) and individual Lhcb1 and Lhcb2 T-DNA KO lines.

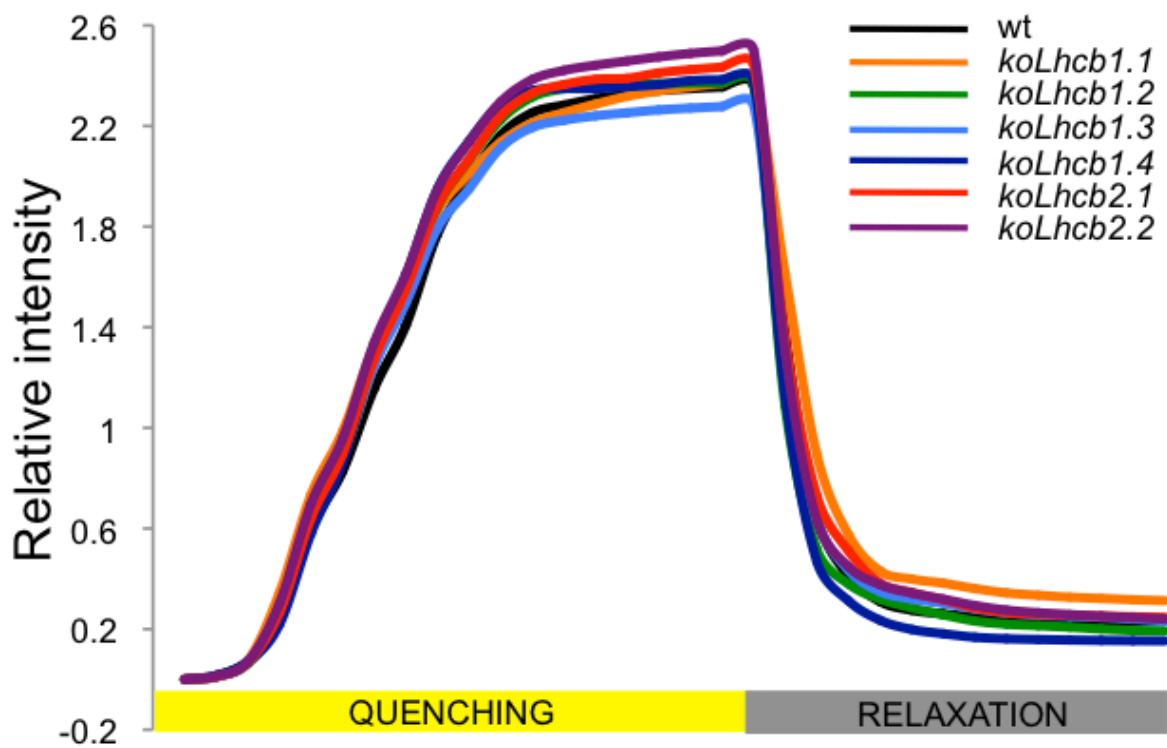

**Supplemental Figure 7.** PQ reduction state (measured as F/F<sub>m</sub>).

The reduction state was measured at different light intensities in wild type (black), *amiLhcb1* (magenta), *amiLhcb2* (blue), *stn7* (green), and *pph1/tap38* (orange). Arbitrary units are shown.

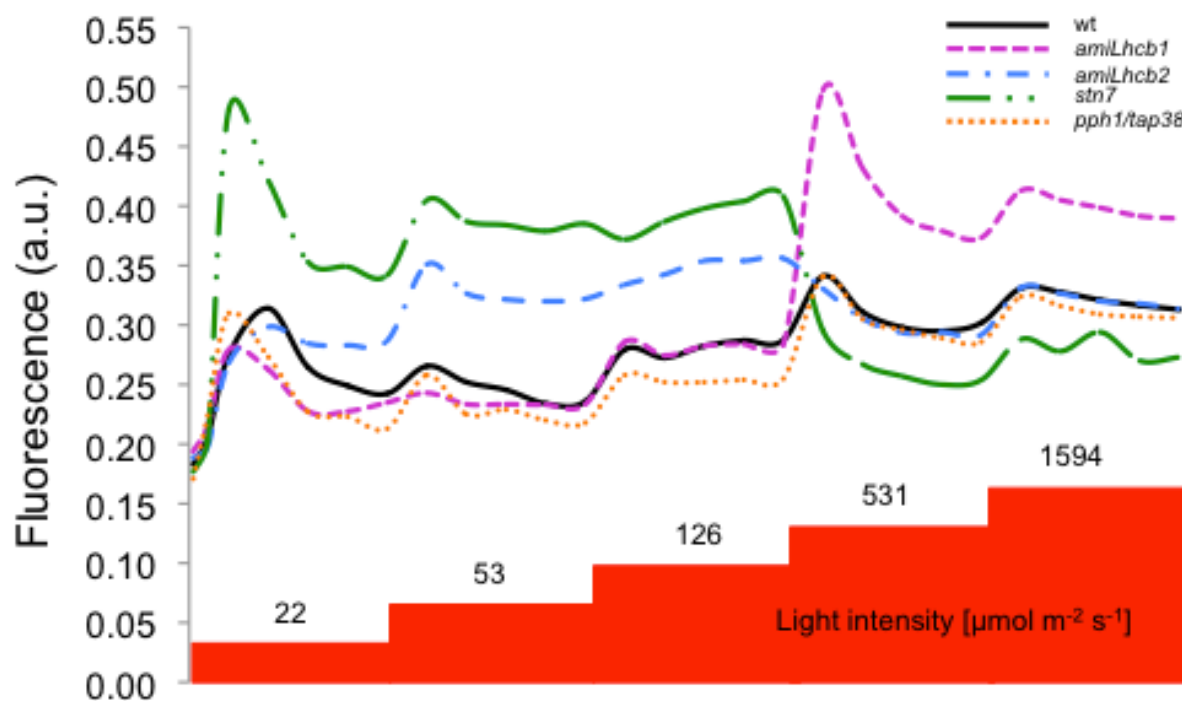

Supplement: supp_tpc.114.127373_tpc127373_SupplementalData.pdf [file supp_tpc.114.127373_tpc127373_SupplementalData.pdf]
